# Supplementary material
Source: PubMed Central journal article supplement (PMC6030477)

## SUPPLEMENTARY INFORMATION

### Generation of Immunity to the Folate Receptor Alpha in Breast and Ovarian Cancer Patients Following Active Immunization with a Folate Receptor Alpha Peptide Vaccine

Kimberly R. Kalli<sup>1\*</sup>, Matthew S. Block<sup>1,2\*</sup>, Pashtoon M. Kasi<sup>1</sup>, Courtney L. Erskine<sup>2</sup>, Timothy J. Hobday<sup>1</sup>, Allan B. Dietz<sup>3</sup>, Douglas J. Padley<sup>3</sup>, Michael P. Gustafson<sup>3</sup>, Dan W. Visscher<sup>3</sup>, Danell J. Puglisi-Knutson<sup>2</sup>, Barath Shreeder<sup>2</sup>, Toni K. Mangskau<sup>4</sup>, Glynn Wilson<sup>5</sup>, and Keith L. Knutson<sup>2</sup>.

<sup>1</sup>Department of Oncology, <sup>2</sup>Department of Immunology, <sup>3</sup>Department of Laboratory Medicine and Pathology, and the <sup>4</sup>Mayo Clinic Cancer Education Program, Mayo Clinic, Rochester, MN 55905 and Jacksonville FL 32224. <sup>5</sup>Tapimmune, Inc., Jacksonville, FL 32202

**Correspondence:** Dr. Keith L. Knutson, Professor of Immunology, Department of Immunology, Mayo Clinic, 4500 San Pablo Rd. Jacksonville, FL 32224, 904-953-6657, [knutson.keith@mayo.edu](mailto:knutson.keith@mayo.edu)

## SUPPLEMENTARY RESULTS

### ***Vaccination generates T cell but not antibody immunity to FR $\alpha$ following immunization***

The frequency of IFN- $\gamma$ -producing T cells specific for FR $\alpha$  peptides, FR $\alpha$  protein, TT, and control peptide were compared between pre-treatment samples and multiple post-treatment samples, both during vaccine treatment (up to 30 days following the last vaccination) using the FBS-based ELIspot. T cell immunity was assessed in 15 of 21 patients. In Supplementary Fig. 1A the pre-immunization and highest post-immunization T cell frequencies are plotted, excluding values from the observation period at 3, 6, and 12 months following the final vaccination. The median number of post-vaccination (not including observations) period samples was 6 (range 2-6). The pre-immunization IFN- $\gamma$  T cell frequency to FR30 was  $229 \pm 65$  ( $\pm$  s.e.m., n=14) T cells/million PBMCs which increased to  $419 \pm 75$  T cells/million PBMCs ( $p=0.002$ ). To FR56, T cells increased from  $210 \pm 67$  to  $407 \pm 88$  ( $p=0.031$ ), to FR76 from  $68 \pm 29$  to  $300 \pm 63$  ( $p=0.006$ ), to FR113 from  $40 \pm 12$  to  $299 \pm 63$  ( $p=0.04$ ), to FR238 from  $99 \pm 47$  to  $249 \pm 61$  ( $p=0.05$ ). There was a minor and insignificant increase in the reactivity to the pan-DR binding cyclin D1 peptide from  $45 \pm 20$  to  $76 \pm 15$  ( $p=0.2$ ). For FR $\alpha$ , the mean frequency increased  $142 \pm 46$  to  $333 \pm 78$  T cells ( $p=0.019$ ), which indicates that the vaccine is generating T cells that are recognizing naturally processed antigens. Lastly, the mean TT T cell frequency increased from  $590 \pm 68$  to  $728 \pm 95$  TT-specific T cells per million PBMC, although this increase was not significant likely due to the low SNR ( $p=0.2$ ) (Supplementary Fig. 1B).

**Supplementary Fig. 1: Vaccination generates T cell immunity to FR $\alpha$  following immunization.** **Panel A** shows the mean (n=15 patients) pre-immunization (Pre) and highest post-vaccination (Post) frequency of antigen-specific T cells frequencies (per million PBMC plated) that recognize vaccine antigens, FR30, FR56, FR76, FR113, and FR238. Assay was done using the FBS-based ELIspot. Also shown are frequencies to control cyclin D1 and the FR $\alpha$  protein. **Panel B** shows the mean pre-immunization (Pre) and highest post-vaccination (Post) frequency of tetanus toxoid-specific T cells for same patients in Panel A. p values shown were calculated using the paired student's T test. Each line traces the pre- and post-antigen-specific T cell levels for a single unique patient measured during the vaccine period.

### Supplementary Fig. 1

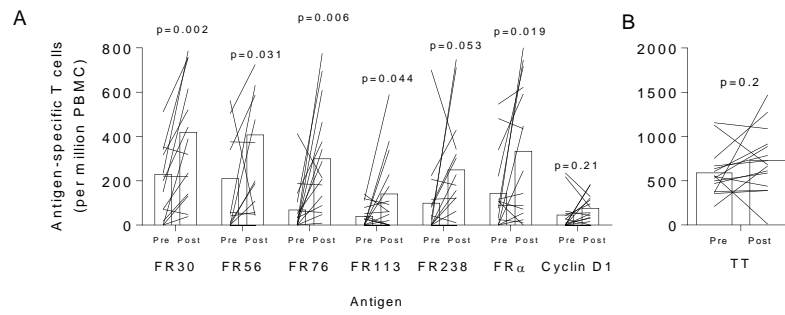

Supplement: NIHMS952892-supplement-1.pdf [file NIHMS952892-supplement-1.pdf]
